# Supplementary material for: Lignosulfonate functionalized g-C3N4/carbonized wood sponge for highly efficient heavy metal ion scavenging
Source: Royal Society of Chemistry journal article supplement (doi:10.1039/d0ta00382d), 2020-01-01
Supplement: d0ta00382d1.pdf [file d0ta00382d1.pdf]

## Supporting Information

### **Lignosulfonate functionalized g-C<sub>3</sub>N<sub>4</sub>/carbonized wood sponge for highly efficient heavy metal ions scavenging**

Yue Gu,<sup>a,b</sup> Mengxiang Ye,<sup>a,b</sup> Yongchuang Wang,<sup>a,b</sup> Huaimeng Li,<sup>a,b</sup> Haimin Zhang,<sup>a</sup> Guozhong Wang,<sup>a</sup> Yunxia Zhang\*,<sup>a</sup> and Huijun Zhao<sup>a,c</sup>

*<sup>a</sup> Key Laboratory of Materials Physics, Centre for Environmental and Energy Nanomaterials, Anhui Key*

*Laboratory of Nanomaterials and Nanotechnology, CAS Centre for Excellence in Nanoscience, Institute of Solid*

*State Physics, Chinese Academy of Sciences, Hefei 230031, China.*

*<sup>b</sup> University of Science and Technology of China, Hefei 230026, P. R. China*

*<sup>c</sup> Centre for Clean Environment and Energy, Griffith University, Gold Coast Campus, Queensland 4222, Australia.*

---

\* Correspondence Author. Email: [yxzhang@issp.ac.cn](mailto:yxzhang@issp.ac.cn)  
Fax: +86-551-65591434; Tel: +86-551-65592145

The  $K_d$  values are defined by the equation:

$$K_d = \frac{(C_0 - C_e)}{C_e} \times \frac{V}{m}$$

where  $C_0$  (mg/L) and  $C_e$  (mg/L) are the initial and equilibrium concentrations of metal ions;  $V$  is the volume of the treated solution (mL);  $m$  is the weight of adsorbent (g). In generally,  $K_d$  values above  $10^4$  are generally regarded as very good, while values above  $10^5$  are exceptional.

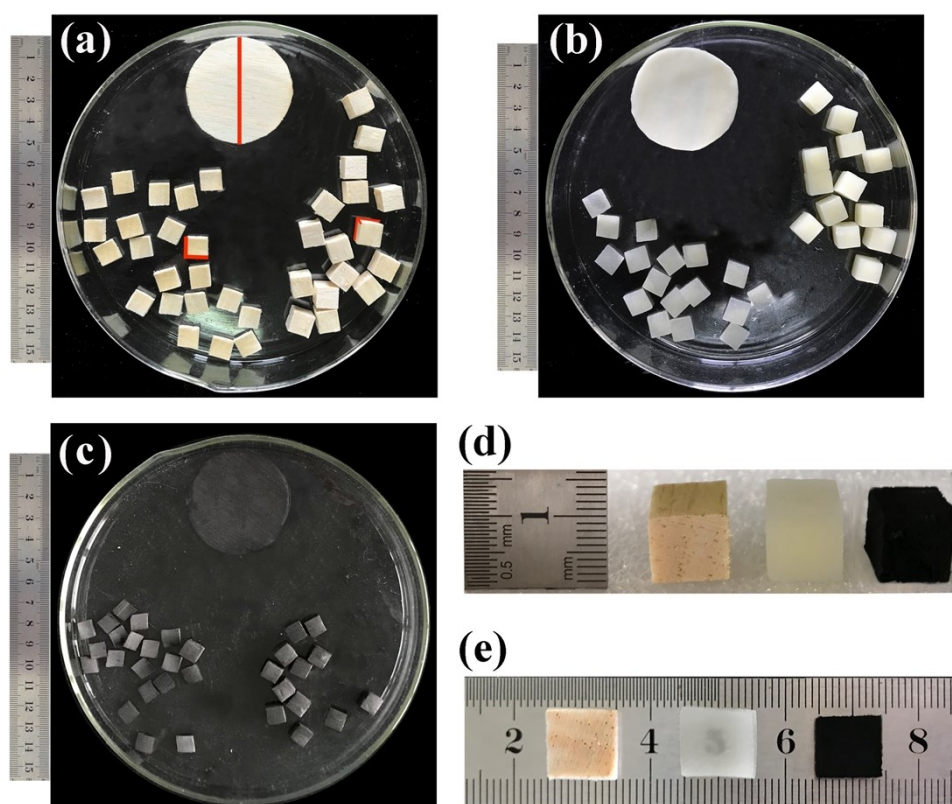

**Fig. S1** Photograph illustration of (a) natural balsa wood, (b) delignified balsa wood aerogel, (c) LS-C<sub>3</sub>N<sub>4</sub>/CWS. Graphical comparison from left to right of natural balsa wood, delignified balsa wood aerogel and g-C<sub>3</sub>N<sub>4</sub>/CWS: (d) cube with a size of 10 mm × 10 mm × 10 mm and (e) slice with a size of 10 mm × 10 mm × 1 mm. The size of these three materials are similar but colors change significantly: delignified balsa wood aerogel appears to be white and transparent; while LS-C<sub>3</sub>N<sub>4</sub>/CWS is black due to pyrolysis at 550 °C. According to statistics, the qualities of cube-shape natural balsa wood, delignified balsa wood aerogel and LS-C<sub>3</sub>N<sub>4</sub>/CWS are 0.1308 g, 0.0315 g and 0.0436 g, respectively; while the sliced natural balsa wood, delignified balsa wood aerogel and LS-C<sub>3</sub>N<sub>4</sub>/CWS are 0.0131 g, 0.0030 g and 0.0044 g, respectively.

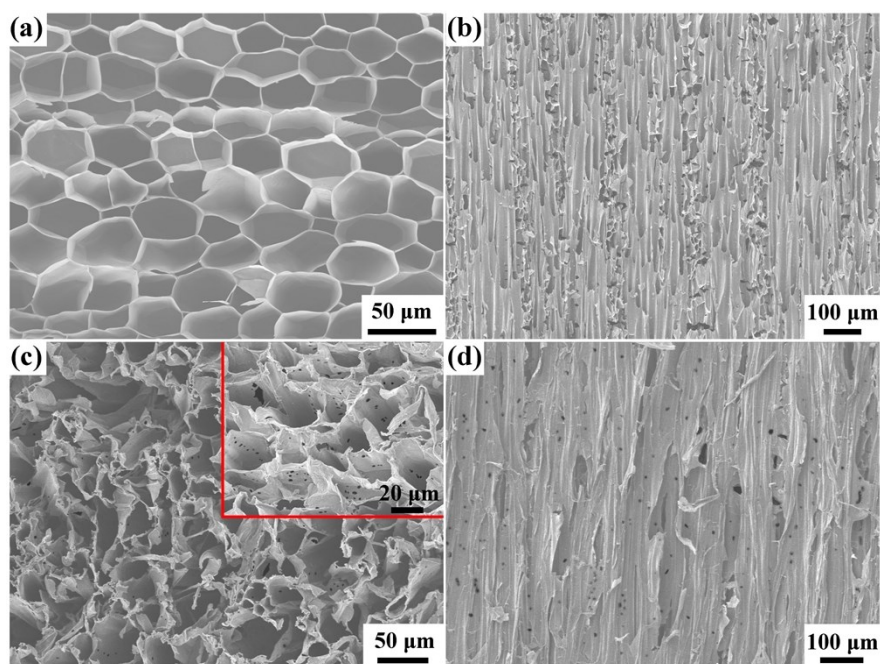

**Fig. S2** SEM images: (a) cross-section of natural balsa wood slice; (b) longitudinal section of natural balsa wood slice; (c) cross-section of delignified balsa wood aerogel; (d) longitudinal section of natural balsa wood slice.

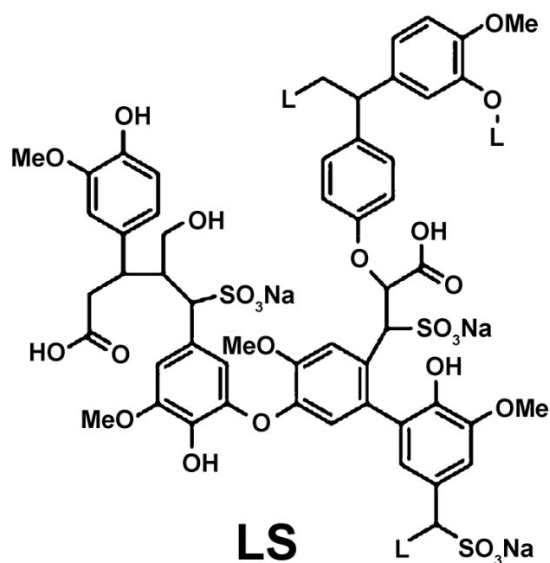

**Fig. S3** Chemical structure of a typical lignosulfonate (LS) segment (L= Lignin).

**Table S1** The apparent densities of various samples.

| Materials                             | Density (mg/cm <sup>3</sup> ) | Materials                            | Density (mg/cm <sup>3</sup> ) |
|---------------------------------------|-------------------------------|--------------------------------------|-------------------------------|
| WS                                    | 29.8                          | g-C <sub>3</sub> N <sub>4</sub> /CWS | 38.2                          |
| CWS                                   | 9.2                           | LS-CWS                               | 10.2                          |
| LS-C <sub>3</sub> N <sub>4</sub> /CWS | 49.3                          |                                      |                               |

**Table S2** Element composition of CWS, g-C<sub>3</sub>N<sub>4</sub>/CWS and LS-C<sub>3</sub>N<sub>4</sub>/CWS.

| samples                               | Elemental analysis/wt% |      |       |       |      |
|---------------------------------------|------------------------|------|-------|-------|------|
|                                       | C                      | H    | N     | O     | S    |
| CWS                                   | 78.05                  | 1.54 | 1.19  | 12.34 | 0.01 |
| g-C <sub>3</sub> N <sub>4</sub> /CWS  | 54.79                  | 1.96 | 35.68 | 6.89  | 0.00 |
| LS-C <sub>3</sub> N <sub>4</sub> /CWS | 64.11                  | 2.15 | 9.09  | 21.71 | 1.15 |

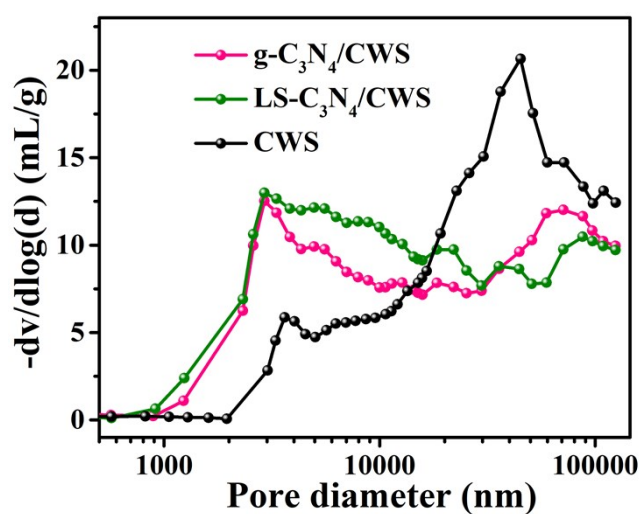

**Fig. S4** Macropore size distribution curves of the obtained samples by mercury intrusion porosimetry.

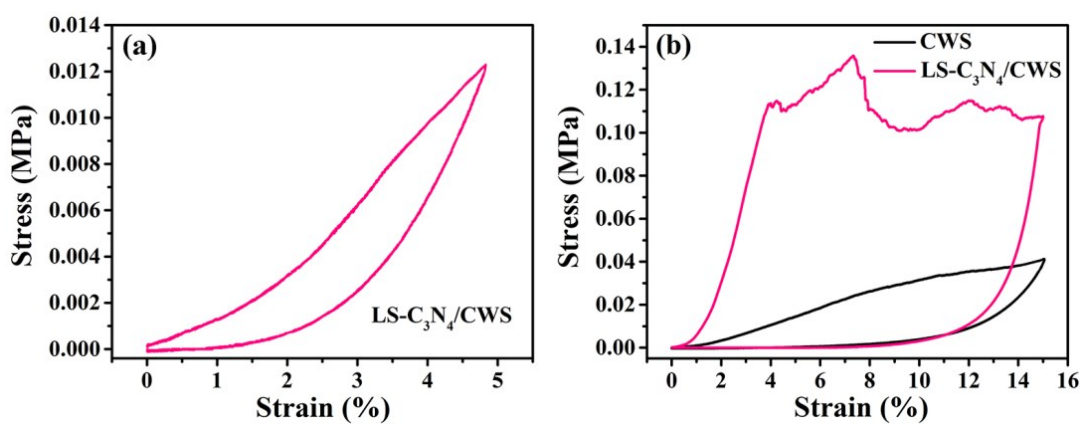

**Fig. S5** (a) Stress–strain curves of LS-C<sub>3</sub>N<sub>4</sub>/CWS under compression with maximum strains of 5%; (b) Stress–strain curves of WS and LS-C<sub>3</sub>N<sub>4</sub>/CWS under compression with maximum strains of 15%.

**Table S3.** Langmuir and Freundlich isotherm parameters for LS-C<sub>3</sub>N<sub>4</sub>/CWS toward Pb<sup>2+</sup>, Cd<sup>2+</sup> and Cu<sup>2+</sup>.

| Models           | Langmuir model          |                       |                | Freundlich model      |        |                |
|------------------|-------------------------|-----------------------|----------------|-----------------------|--------|----------------|
| parameters       | Q <sub>max</sub> (mg/g) | K <sub>L</sub> (L/mg) | R <sup>2</sup> | K <sub>F</sub> (mg/g) | 1/n    | R <sup>2</sup> |
| Pb <sup>2+</sup> | 659.6                   | 0.0792                | 0.9993         | 80.3                  | 0.3786 | 0.9352         |
| Cd <sup>2+</sup> | 329.1                   | 0.0738                | 0.9992         | 72.7                  | 0.2800 | 0.8872         |
| Cu <sup>2+</sup> | 173.5                   | 0.0361                | 0.9990         | 38.2                  | 0.2741 | 0.8808         |

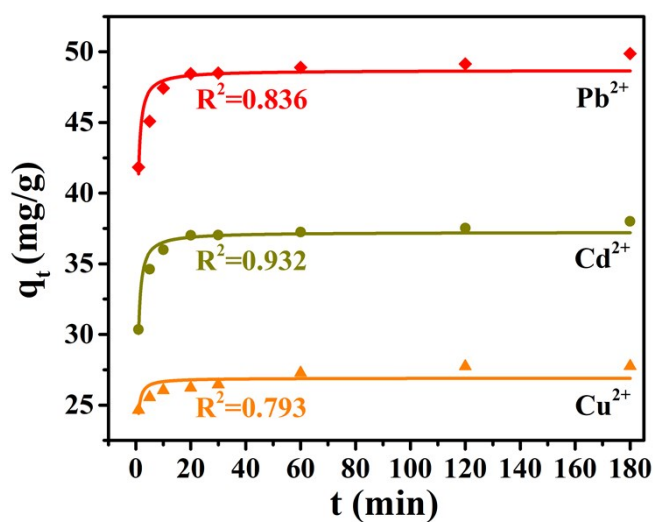

**Fig. S6** Pseudo-first-order model kinetic fitting curves of Pb<sup>2+</sup>, Cd<sup>2+</sup> and Cu<sup>2+</sup> on LS-C<sub>3</sub>N<sub>4</sub>/CWS adsorbent.

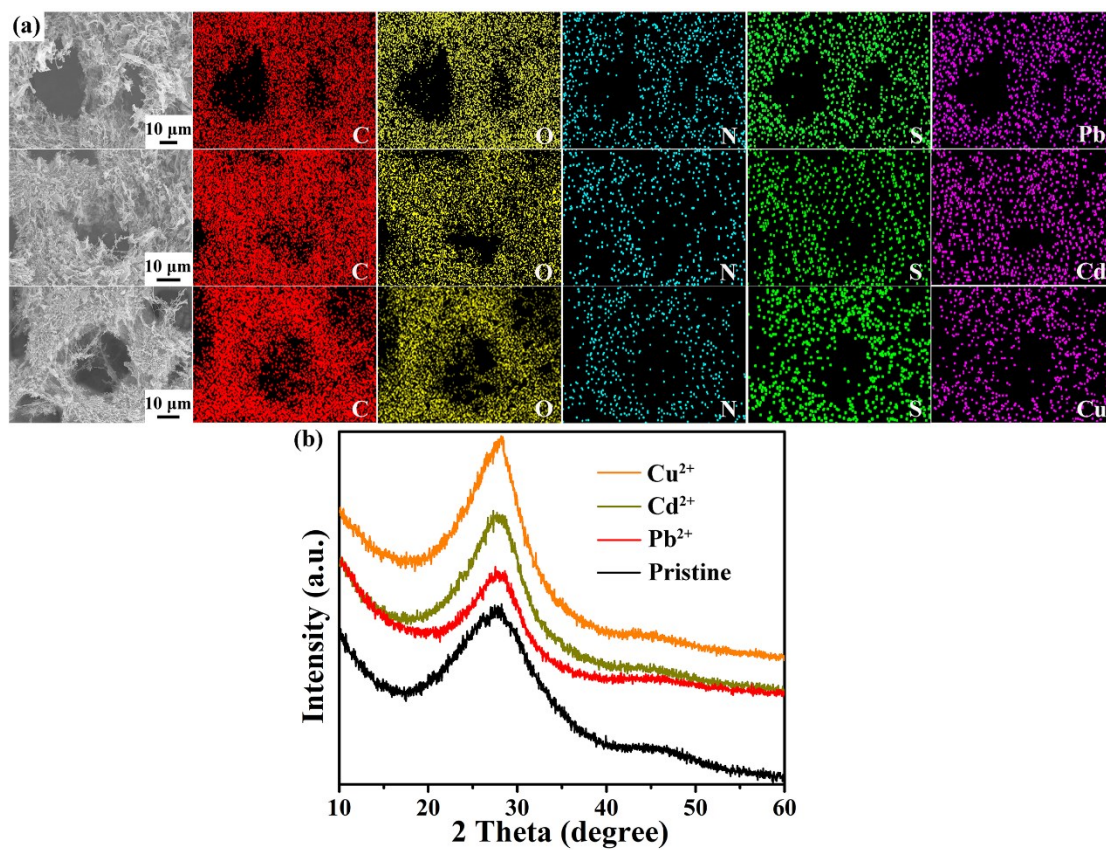

**Fig. S7** SEM images with EDS mapping (a) and XRD patterns of LS-C<sub>3</sub>N<sub>4</sub>/CWS (b) after Pb<sup>2+</sup>, Cd<sup>2+</sup> and Cu<sup>2+</sup> sorption.

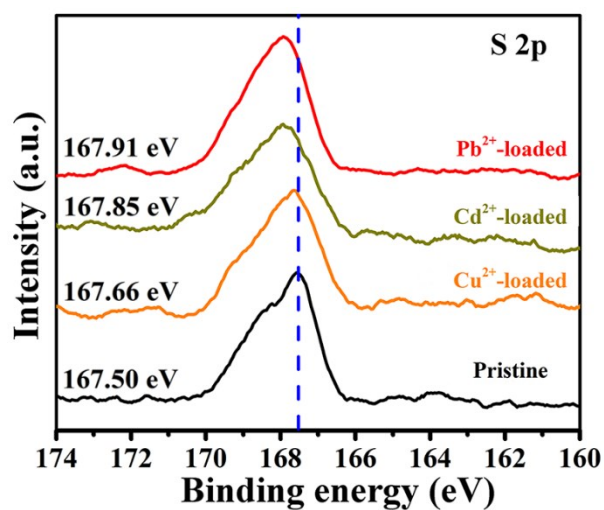

**Fig. S8** S 2p spectra for LS-C<sub>3</sub>N<sub>4</sub>/CWS before and after adsorption of Pb<sup>2+</sup>, Cd<sup>2+</sup> and Cu<sup>2+</sup>.
